# Supplementary material for: Body Fat Distribution and Left Atrial Reverse Remodeling After Catheter Ablation for Atrial Fibrillation
Source: PubMed Central journal article supplement — JACC Adv. 2024 May 6;3(6):100973. doi: 10.1016/j.jacadv.2024.100973 (PMC11198089; doi:10.1016/j.jacadv.2024.100973), 2024-05-06

Supplemental Table 1. Ablation procedure characteristics stratified by body size metrics and adiposity profiles.

|                                | BMI           |            | W/H ratio |           | BF%       |            | CF%       |           |
|--------------------------------|---------------|------------|-----------|-----------|-----------|------------|-----------|-----------|
|                                | Normal weight | Overweight | <median   | ≥median   | <median   | ≥median    | <median   | ≥median   |
|                                | (N=68)        | (N=48)     | (N=55)    | (N=61)    | (N=58)    | (N=58)     | (N=58)    | (N=58)    |
| PVI, n (%)                     | 68 (100)      | 48 (100)   | 55 (100)  | 61 (100)  | 58 (100)  | 58 (100)   | 58 (100)  | 58 (100)  |
| Radiofrequency ablation, n (%) | 43 (63.2)     | 29 (60.4)  | 36 (65.4) | 36 (59.0) | 30 (51.7) | 42 (72.4)* | 35 (60.3) | 37 (63.8) |
| Cryoballoon ablation, n (%)    | 25 (36.8)     | 19 (39.6)  | 19 (34.6) | 25 (41.0) | 28 (48.3) | 16 (27.6)* | 23 (39.7) | 21 (36.2) |
| LA line ablation, n (%)        | 1 (1.5)       | 2 (4.2)    | 1 (1.8)   | 2 (3.3)   | 1 (1.7)   | 2 (3.5)    | 1 (1.7)   | 2 (3.5)   |
| SVC isolation, n (%)           | 2 (2.9)       | 0 (0.0)    | 1 (1.8)   | 1 (1.6)   | 2 (3.5)   | 0 (0.0)    | 2 (3.5)   | 0 (0.0)   |
| CTI ablation, n (%)            | 18 (26.5)     | 13 (27.1)  | 15 (27.3) | 16 (26.2) | 17 (29.3) | 14 (24.1)  | 15 (25.9) | 16 (27.6) |
| 3D mapping techniques          |               |            |           |           |           |            |           |           |
| CARTO3, n (%)                  | 48 (70.6)     | 37 (77.1)  | 39 (70.9) | 46 (75.4) | 47 (81.0) | 38 (65.5)  | 46 (79.3) | 39 (67.2) |

|                     |           |           |           |           |           |           |           |           |
|---------------------|-----------|-----------|-----------|-----------|-----------|-----------|-----------|-----------|
| EnSite NavX, n (%)  | 18 (26.5) | 11 (22.9) | 15 (27.3) | 14 (23.0) | 10 (17.2) | 19 (32.8) | 11 (19.0) | 18 (31.0) |
| Rhythmia, n (%)     | 2 (2.9)   | 0 (0.0)   | 1 (1.8)   | 1 (1.6)   | 1 (1.7)   | 1 (1.7)   | 1 (1.7)   | 1 (1.7)   |
| Procedure time, min | 167       | 159       | 168       | 163       | 167       | 165       | 165       | 166       |
|                     | (142-199) | (148-207) | (149-200) | (143-206) | (145-202) | (147-201) | (143-199) | (145-210) |

BF% = body fat percent, BMI = body mass index, CF% = central fat percent, CTI = cavotricuspid isthmus, LA = left atrium, PVI = pulmonary vein isolation, SVC =

superior vena cava and W/H = waist-to-hip. \*p<0.05 compared with corresponding counterpart.

# Supplemental Figure 1

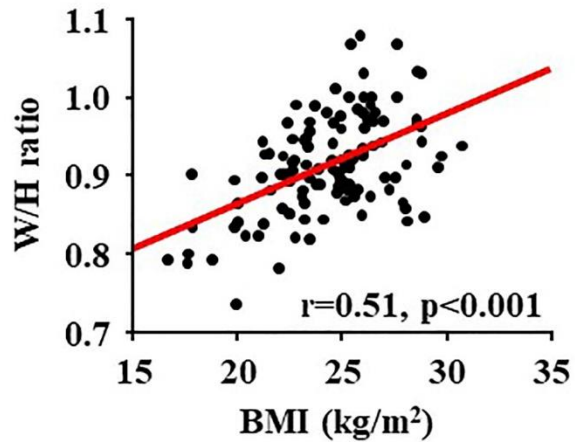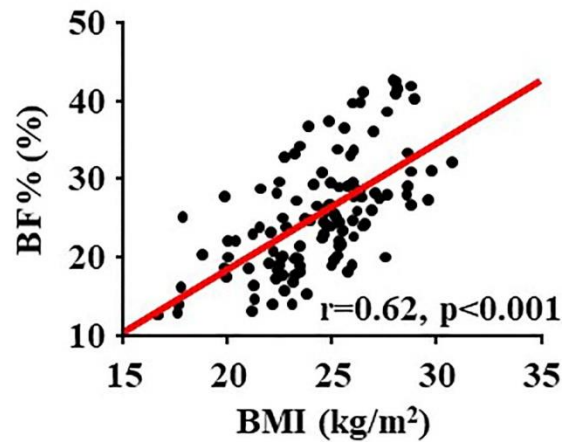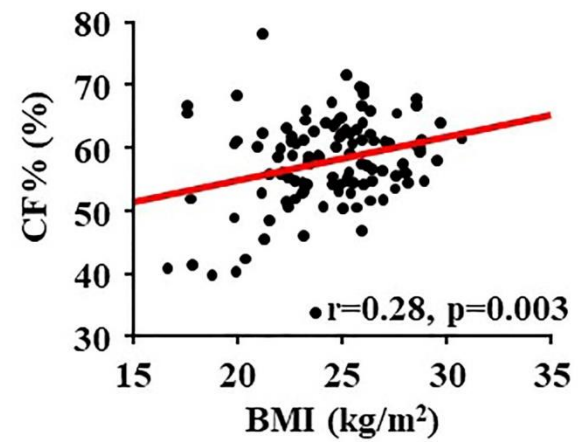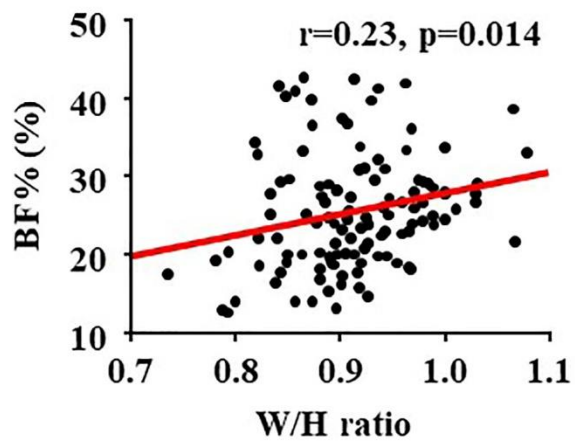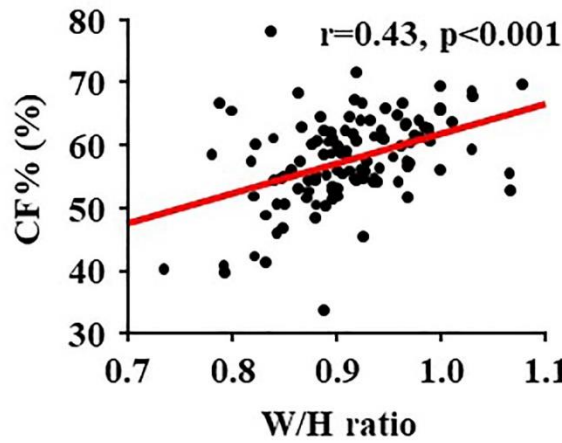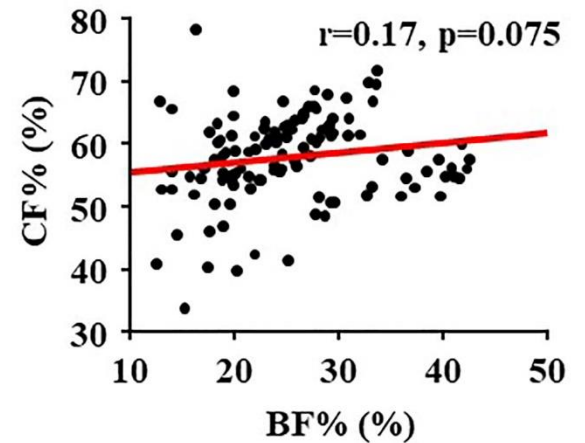

Supplement: mmc1.pdf [file mmc1.pdf]
